# Supplementary material for: The effect of reproductive, hormonal, nutritional and lifestyle on breast cancer risk among black Tanzanian women: A case control study
Source: PubMed Central journal article supplement (PMC8827470; doi:10.1371/journal.pone.0263374), 2022-02-09
Supplement: pone.0263374.s002.pdf [file pone.0263374.s002.pdf]

1 **Swahili Translation of the English questionnaire**

2 **I. Taarifa za mtafiti**

- 3 1. Namba ya dodoso.....
- 4 2. Tarehe ya mahojiano .....
- 5 3. Jina la mtafiti.....
- 6 4. Jina la wodi.....
- 7 5. Namba ya mgonjwa.....
- 8 6. Majibu ya kipimo a)Kansa b) Hana kansa...( Aina ya
- 9 kansa.....)

10

11 **II. Taarifabinafsi za mshiriki**

- 12 1. Ulizaliwa tarehe ngapi? Siku.... / mwezi.../Mwaka (Jaza umri kwa
- 13 miaka).....
- 14 2. Una kiwango gani cha elimu?
- 15 A. Sikuwahi kwenda shule
- 16 B. Elimu ya msingi
- 17 C. Elimu ya sekondari (kidato cha nne)
- 18 D. Elimu ya sekondari (kidato cha sita)/chuo ngazi ya cheti
- 19 E. Chuo ngazi ya Stashahada
- 20 F. Chuo kikuu (Shahada/uzamili/uzamivu)
- 21 3. Unaishiwapi?
- 22 A. Jijini/ Mjini
- 23 B. Kijijini
- 24 4. Unajishughulisha na nini?
- 25 A. Kilimo
- 26 B. Biashara
- 27 C. Mama wa nyumbani
- 28 D. Mwajiriwa
- 29 E. Nyinginezo (Taja).....
- 30 5. Hali ya ndoa
- 31 A. Sijaolewa
- 32 B. Nimeolewa
- 33 C. Ninaishi na mwanaume ila hatujafunga ndoa
- 34 D. Mjane

- 35 E. Tumeachana/Tumetengana
- 36 6. Umeanza kupata hedhi ukiwa na miaka mingapi?.....(miaka)
- 37 7. Bado unapata hedhi?
- 38 A. Ndiyo.....nenda swali la 14
- 39 B. Hapana
- 40 8. Kama hapana, ukomo wa hedhi ulitokeaje?.....
- 41 9. Ulikuwa na umri gani ukomo wa hedhi ulipotokea?.....
- 42 10. Umewahi kutumia dawaza kuongeza vichocheo vya mwili vya kike
- 43 kukinzana na ukomo wa hedhi?
- 44 A. Ndiyo
- 45 B. Hapana
- 46 11. Kama ndiyo umetumia kwa miaka mingapi?.....
- 47 12. Umewahi kutumia dawa zifuatazo?
- 48 A. Dawa za uzazi wa mpango
- 49 i. Ndiyo
- 50 ii. Hapana
- 51 B. Dawa za matibabu ya ugumba
- 52 i. Ndiyo
- 53 ii. Hapana
- 54 13. Umewahi kuwa mjamzito?
- 55 A. Ndiyo
- 56 B. Hapana ....nenda swali la 24
- 57 14. Kama ndiyo, mara ngapi?.....( inahusisha mimba zilizoharibika)
- 58 15. Ulikuwa na umri gani ulipokuwa mjamzito kwa mara ya kwanza?.....
- 59 16. Ulifungua? .....(inahusisha mimba zaidi ya miezi 8)
- 60 A. Ndiyo
- 61 B. Hapana
- 62 17. Umejifungua mara ngapi?.....(inahusisha mimba zilizoharibika baada
- 63 ya miezi 8)
- 64 18. Ulikuwa na umri gani ulipojifungua kwa mara ya kwanza?.....
- 65 19. Je, ulinyonyesha?
- 66 A. Ndiyo
- 67 B. Hapana
- 68 20. Uli/umenyonyesha watoto wangapi?.....
- 69 21. Umenyonyesha kwa muda gani? (inahusisha unyonyeshaji na chakula)
- 70 A. Mtoto wa kwanza .....
- 71 B. Mtoto wa pili.....
- 72 C. Mtoto watatu.....
- 73 22. Una historia ya uvimbe kwenye matiti?
- 74 A. Ndiyo

- 75 B. Hapana
- 76 23. Una historia ya kuwa mnene wakatiwa balehe yako?
- 77 A. Ndiyo
- 78 B. Hapana
- 79 24. Je umewahi/ unavuta sigara?
- 80 A. Ndiyo
- 81 B. Hapana .... nenda swali la 31
- 82 25. Kama ndiyo, ulikuwa na umri wa miaka mingapi ulipoanza
- 83 kuvuta?.....(miaka)
- 84 26. Ulikuwa/unavuta sigara ngapi kwa siku?.....
- 85 27. Umewahi kuishi na mtu anayevuta sigara ndani ya nyumba moja?
- 86 A. Ndiyo .....
- 87 B. Hapana.....nenda swali la 34
- 88 28. Kama ndiyo, Kwa muda gani?
- 89 A. Miezi.....
- 90 B. Miaka .....
- 91 29. Ulikuwa / unakaa muda gani ndani ya nyumba yenye
- 92 moshi?.....(masaa/siku)
- 93 30. Kuna mtu anavuta sigara kazini kwako?
- 94 A. Ndiyo
- 95 B. Hapana.....nenda swali la 36
- 96 31. Unafanya kazi katika mazingira ya moshi wa sigara kwa muda gani kwa
- 97 siku?...miaka?....
- 98 32. Una historia ya kunywa pombe?
- 99 A. Ndiyo
- 100 B. Hapana nenda swali la 38
- 101 33. Ulinza kunywa pombe na miaka mingapi?.....
- 102 34. Kuna ndugu yako amewahi kupatikana na kansa ya ziwa?
- 103 A. Hapana
- 104 B. Ndio (Taja uhusiano wako na huyo ndugu)
- 105 i. Baba
- 106 ii. Mama
- 107 iii. Bibi / Babu
- 108 iv. Ndugu mwingine (taja).....
- 109
- 110
